# Supplementary material for: In silico Screening and Behavioral Validation of a Novel Peptide, LCGA-17, With Anxiolytic-Like Properties
Source: Front Neurosci. 2021 Aug 2;15:705590. doi: 10.3389/fnins.2021.705590 (PMC8372404; doi:10.3389/fnins.2021.705590)
Supplement: Supplementary file 2 [file Table_1.DOCX]

**Table S1. LCGA-17 competitors tested in radioligand binding assays**1 Sigma Aldrich; 2 Gedeon Richter; 3 Fluka; 4 Tocris Bioscience; 5 Axon; 6 Santa Cruz

| Studied compound | Target receptor/ion channel | IC50 (µM) |
| --- | --- | --- |
| 7-OH-DPAT 1 | Dopamine D3R agonist | >100 |
| Haloperidol 2 | Dopamine D2,3,4R antagonist; Sigma1 R ligand. | >100 |
| Spiperone 1 | D2/D4R antagonist; α1B-adrenoceptor antagonist; 5-HT2a/5-HT1R antagonist | >100 |
| Sulpiride 1 | Dopamine D2,3R and 5-HT1AR antagonist | >100 |
| Ketanserin 1 | 5HT2aR antagonist | >100 |
| Bicuculline 3 | GABAAR competitive antagonist | >100 |
| GABA 1 | GABAAR and GABABR agonist | >100 |
| Allopregnanolone 4 | GABAAR positive allosteric modulator | >100 |
| Bretazenil 4 | GABAAR BZD site α1 subtype-selective agonist | >100 |
| CGS-9895 1 | GABAAR BZD site antagonist | >100 |
| Diazepam 1 | GABAAR BZD site agonist | >100 |
| Flumazenil 1 | GABAAR BZD site antagonist | >100 |
| Gaboxadol (THIP) 4 | GABAAR α4β3δ subtype partial agonist | >100 |
| MK0343 4 | GABAAR α3 subtype-selective agonist | >100 |
| Muscimol 3 | GABAAR agonist | >100 |
| Pregnenolone 1 | GABAAR negative allosteric modulator | >100 |
| [Salicylidene salicylhydrazide](https://pubmed.ncbi.nlm.nih.gov/15100159/) 4 | GABAAR antagonist | >100 |
| SL 651498 5 | GABAAR α2 subtype-selective agonist | >100 |
| Gabazine 6 | GABAAR antagonist selective for extrasynaptic receptors | >100 |
| TB21007 4 | GABAAR α5 subtype-selective inverse agonist | >100 |
| THDOC 4 | GABAAR α4,6 subtype-selective agonist | >100 |
| Zolpidem 1 | GABAAR BZD site agonist (α1ssubtype-selective) | >100 |
| Baclofen 1 | GABABR agonist | >100 |
| Glutamate 1 | Glutamate receptor agonist | >100 |
| Arcaine 1 | NMDAR polyamine site ligand | >100 |
| Spermine 1 | NMDAR polyamine site ligand | >100 |
| Glycine 1 | NMDAR glycine site agonist | >100 |
| Ifenprodil 6 | NMDAR inhibitor | >100 |
| MK-801 1 | NMDAR noncompetitive antagonist | >100 |
| Ro-256981 6 | NMDAR GluN2B subunit selective antagonist | >100 |
| LY-354740 6 | mGlu2R-selective agonist | >100 |
| FGIN-1-27 4 | Mitochondrial diazepam-binding inhibitor receptor ligand | >100 |
| Gabapentin 1 | α2δ subunit-containing VGCCs, antagonist | **11 ± 0.1** |
| GBR-12909 4 | Dopamine reuptake inhibitor | >100 |
| Nicotine 4 | Nicotinic AChR agonist | >100 |
| PK-11195 1 | TSPO (translocator protein, peripheral BZD receptor ligand) | >100 |
